# Supplementary material
Source: PubMed Central journal article supplement (PMC3734946)
Supplement: NIHMS494611-supplement-1_si_001.pdf [file NIHMS494611-supplement-1_si_001.pdf]

Supporting Information for “Quantitation of Recombinant Protein in Whole Cells and Cell Extracts by Solid-State NMR Spectroscopy” by E. P. Vogel and D. P. Weliky

A. RP plasmid and cell types

**Table S11.** RP plasmids and *E. coli* cell types

| Sample type     | Recombinant protein (RP) | Plasmid type | Cell type |
|-----------------|--------------------------|--------------|-----------|
| RP <sup>-</sup> | None                     | pET24a+      | Rosetta2  |
| RP <sup>+</sup> | Fgp41                    | pET24a+      | Rosetta2  |
| RP <sup>+</sup> | Fgp41+                   | pET24a+      | Rosetta2  |
| RP <sup>+</sup> | FHA2                     | pET24a+      | Rosetta2  |
| RP <sup>+</sup> | Hairpin                  | pGEMT        | BL21(DE3) |
| RP <sup>+</sup> | Human Proinsulin (HPI)   | pQE-31       | BL21(DE3) |

**Table S12.** RP amino acid sequences<sup>a</sup>

Fgp41

AVGLGAVFLGFLGAAGSTMGAASMTLTVQARQLLSGIVQQQSNLLKAIEA  
 QQHLLKLTVWGIKQLQARVLAVERYLQDQQLLGIWGWASGKLIATSFVPWN  
 NSWSNKTYNEIWDNMTWLQWDKEISNYTDTIYRLLEDSQNQQEKNEQDL  
 LALDKLEHHHHH

Fgp41+

AVGLGAVFLGFLGAAGSTMGAASMTLTVQARQLLSGIVHQQSNLLKAIEA  
 QQHLLKLTVWGIKQLQARVLAVERYLQDQQLLGIWGWASGKLIATSFVPWN  
 NSWSNKTYNEIWDNMTWLQWDKEISNYTDTIYRLLEDSQNQQEKNEQDL  
 LALDKWANLWNWFSITNWLWYIKLEHHHHH

FHA2

GLFGAIAGFIENGWEGMIDGWYGFRRHQNSEGTGQAADLKSTQAAIDQING  
 KLN RVIEKTNEKFHQIEKEFSEVEGRIQDLEKYVEDTKIDLWSYNAELLVALE  
 NQHTIDLTDSEMKNLFEKTRRQLRENAEEMGNGSFKIYHKADNAAIESIRN  
 GTYDHDVYRDEALNNRFQIKGVELKSGYKDWVEHHHHH

Hairpin

CTLTVQARQLLSGIVQQQNNLLRAIEAQQHLLQLTVWGIKQLQARILSGGR  
GGWMEWDREINNYTSLIHSLIEESQNQQEKNEQELLELDKW

Human Proinsulin (HPI)

GSSHHHHHSSGLDPVLMFVNQHLCGSHLVEALYLVCGERGFFYTPKTRRE  
 AEDLQVGQVELGGGPGAGSLQPLALEGSLQKRGIVEQCCTSICSLYQLENY  
 CN

<sup>a</sup> Underlined regions contain non-native residues that were inserted into the sequence.

### B. Materials

The Fgp41 plasmid included an insert corresponding to the 154 N-terminal residues of the gp41 protein of HIV-1 (Q45D5 primary isolate). The human proinsulin (HPI) plasmid was obtained from Dr. Robert B. Mackin at Creighton University and contained an insert corresponding to the 87 residues of human proinsulin. The FHA2 plasmid was obtained from Dr. Yeon-Kyun Shin at Iowa State University and contained an insert corresponding to the 185 N-terminal residues of the HA2 subunit of the hemagglutinin protein of the influenza virus (X31 strain). The Hairpin plasmid was obtained from Dr. Kelly Sackett at Michigan State University and contained an insert corresponding to residues 23-70 and 117-145 of the gp41 protein of HIV-1 (HXB2 laboratory strain). The insert also included a SGGRGG linker between the two gp41 regions. Each plasmid was transformed into either BL21(DE3) or BL21(DE3) Rosetta2 chemically competent *E. coli* cells (Novagen, Gibbstown, NJ). Other reagents and their sources include: Luria-Bertani Broth (LB) medium (Acumedia, Lansing, MI); isopropyl- $\beta$ -D-thiogalactopyranoside (IPTG) (Anatrace, Maumee, OH); isotopically labeled amino acids (Cambridge Isotope Laboratories, Andover, MA). Other materials were obtained from Sigma-Aldrich (St. Louis, MO).

### C. Sample preparation

One 250 mL flask containing 100 mL of LB and the proper antibiotic was inoculated with 0.5 mL of a glycerol stock of *E. coli* cells that contained a specific plasmid. The flask was placed in an incubator shaker with shaking at 180 rpm and a temperature of 37 °C. After 16 hours, the OD<sub>600</sub> was ~4 and the cells were harvested by centrifugation at 10,000g at 4°C for 10 minutes. The cells were then resuspended into a 250 mL baffled flask containing 50 mL of M9 minimal medium, antibiotic, 100  $\mu$ L of 1.0 M MgSO<sub>4</sub>, and 250  $\mu$ L of 50% v/v glycerol. After about one hour of shaking at 180 rpm at 37 °C, log(OD<sub>600</sub>) vs time was linear and the *E. coli* cells were induced by addition of IPTG to a concentration of 2.0 mM. Induction continued for 3 hours with shaking at 37 °C. For many growths, a dry mixture was prepared that contained 10 mg of each of the 20 common amino acids. One or two of the amino acids typically also contained <sup>13</sup>C and/or  $\alpha$ -<sup>15</sup>N isotopic labeling. This mixture was added to the medium just before addition of IPTG and an equivalent mixture was added after one hour of induction. After three hours of expression, the cells were harvested by centrifugation at 10,000 g at 4°C for 10 minutes. The cell pellet (~0.5 g wet mass) was stored at -20 °C.

“Whole cell” (WC) NMR samples were lyophilized cell pellets. “Insoluble cell pellet” (ICP) samples were prepared by first suspending ~0.5 g whole cell pellet in ~40 mL PBS (pH 7.3) followed by placement on ice. Lysis of the *E. coli* cells was achieved by sonication with a tip sonifier (4 one minute cycles, 80% amplitude, 0.8 seconds on, 0.2 seconds off). After sonication, the suspension was centrifuged at 50,000g at 4°C for 20 minutes. The supernatant (containing soluble proteins) was discarded and the ICP with inclusion body (IB) RP was not lyophilized.

### D. SDS-PAGE

10 mg of ICP was suspended in 100  $\mu$ L of SDS-containing sample buffer. Each suspension was vortexed, boiled for 5 minutes, and then centrifuged for one minute. The supernatant was diluted 5X with SDS-containing sample buffer and 15  $\mu$ L of this solution was added to a well in the electrophoretic apparatus.

### E. Solid-state NMR (SSNMR)

The sample (either WC or ICP) was packed into a 4 mm diameter solid-state NMR magic angle spinning (MAS) rotor. The active sample volume of the rotor was ~40  $\mu$ L. Data were obtained with a 9.4 T instrument (Agilent Infinity Plus) and a triple-resonance MAS probe whose rotor was cooled with nitrogen gas at  $-20$  °C. Experimental parameters included: (1) 8.0 kHz MAS frequency; (2) 5  $\mu$ s  $^1$ H  $\pi/2$  pulse and 2 ms cross-polarization time with 50 kHz  $^1$ H field and 70-80 kHz ramped  $^{13}$ C field; (3) 1 ms rotational-echo double-resonance (REDOR) dephasing time with a 9  $\mu$ s  $^{13}$ C  $\pi$  pulse at the end of each rotor period except the last period and for the  $S_1$  acquisition, a 12  $\mu$ s  $^{15}$ N  $\pi$  pulse at the center of each rotor period; and (4)  $^{13}$ C detection with 90 kHz two-pulse phase modulation  $^1$ H decoupling (which was also on during the dephasing time); and (5) 0.8 sec pulse delay. Data were acquired without ( $S_0$ ) and with ( $S_1$ )  $^{15}$ N  $\pi$  pulses during the dephasing time and respectively represented the full  $^{13}$ C signal and the signal of  $^{13}$ Cs not directly bonded to  $^{15}$ N nuclei.<sup>1,2</sup> Spectra were externally referenced to the methylene carbon of adamantane at 40.5 ppm so that the  $^{13}$ CO shifts could be directly compared to those of soluble proteins.<sup>3</sup>

### F. Suppression of scrambling of isotopic labels

Experimental design of the HCN variant of the method included targeting a specific dipeptide sequence in the RP through addition to the expression medium of either: (1) one  $^{13}$ CO-labeled amino acid and one  $^{15}$ N-labeled amino acid; or (2) one single  $^{13}$ CO,  $^{15}$ N-labeled amino acid. Glycerol was the only other carbon source and  $\text{NH}_4\text{Cl}$  was the only other nitrogen source in the expression medium. A negative control “RP<sup>+</sup><sub>lab</sub>” whole cell (WC) sample was prepared with this protocol using cells that contained the FHA2 plasmid and with  $^{13}$ CO-Ala and  $^{15}$ N-Val in the expression medium. As shown in **Fig. S11a**, some  $\Delta S$  signal was observed even though there are no AV dipeptides in the FHA2 sequence. This signal may be due to AV dipeptides in other proteins produced during the expression period. Alternatively, there could be metabolic scrambling in the bacteria of the  $^{13}$ CO label into other “X” amino acids and/or scrambling of the  $^{15}$ N label into other “Y” amino acids with consequent  $\Delta S$  signal from AY, XV, or XY dipeptides in the FHA2 sequence. The protocol was modified to suppress scrambling by first preparing a solid mixture containing 10 mg each of: (1)  $^{13}$ CO-Ala; (2)  $^{15}$ N-Val; and (3) each of the 18 other amino acids (unlabeled). This mixture was added to the culture just prior to induction and an equivalent mixture was added after one hour of induction. Scrambling was greatly reduced with the modified protocol as evidenced by a  $\Delta S$  signal (**Fig. S11b**) that was ~3-times smaller than the signal of the sample prepared with the initial protocol (**Fig. S11a**). The suppression of scrambling was likely through product feedback inhibitory loops of the bacterial amino acid metabolic pathways.<sup>4</sup>

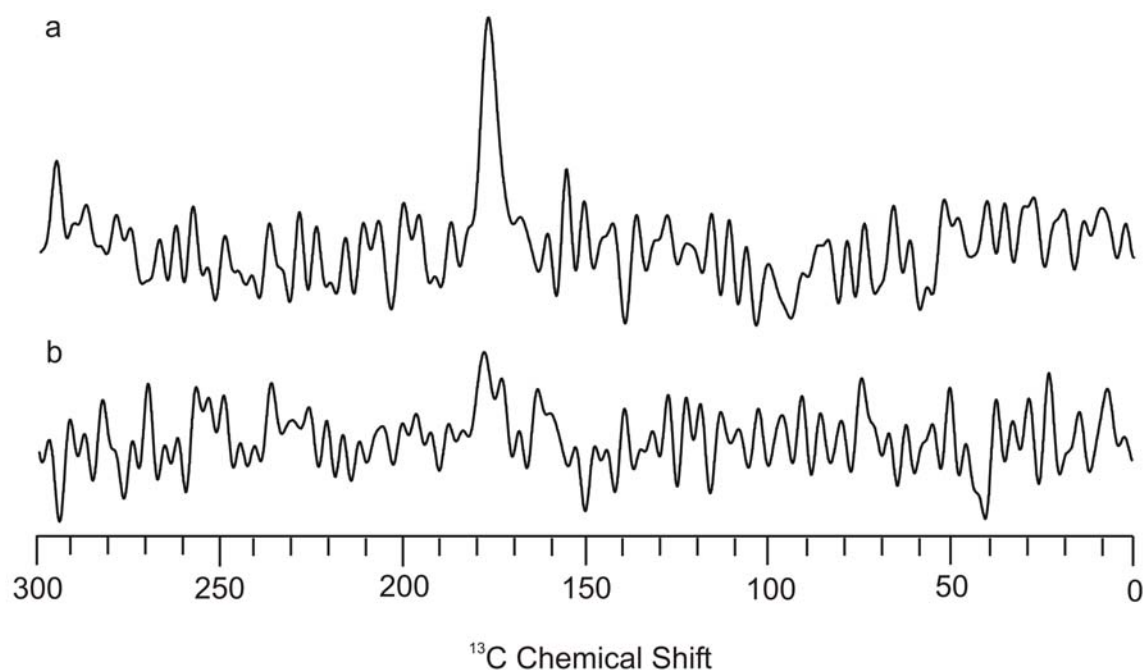

**Figure S11:**  $\Delta S$  spectra for WC samples prepared using expression medium that contained: (a)  $^{13}\text{C}$ -Ala and  $^{15}\text{N}$ -Val as well as glycerol and  $\text{NH}_4\text{Cl}$ ; or (b)  $^{13}\text{C}$ -Ala,  $^{15}\text{N}$ -Val, and the other 18 amino acids in unlabeled form, as well as glycerol and  $\text{NH}_4\text{Cl}$ . Each  $\Delta S$  spectrum was the result of the difference between (a) 46652  $S_0$  and 46652  $S_1$  scans or (b) 43647  $S_0$  and 43647  $S_1$  scans. There is no line broadening or baseline correction. The panel a integrated intensity in the  $^{13}\text{C}$  chemical shift range (185-170 ppm) was  $58.1 \pm 9.9$  and the panel b intensity was  $21.3 \pm 8.3$ . Each uncertainty was the standard deviation of the integrated intensities in 13 other regions of the spectrum for which no  $\Delta S$  intensity is expected, cf. **Table S13** below. The difference in the standard deviations of the two samples was not statistically significant at the 95% confidence level as evaluated by the F test. For the 12 degrees of freedom in each data set, the critical value of F is 2.69 which is greater than the 1.43 value calculated from the data.

**Table S13.** Integrated intensities of the **Fig. S11** spectra<sup>a</sup>

| Shift integration interval (ppm) | Spectrum a | Spectrum b |
|----------------------------------|------------|------------|
| 185 → 170 ≡ $I_{\Delta S}$       | 58.1279    | 21.341     |
| 400 → 385                        | 2.6401     | 5.7787     |
| 380 → 365                        | -14.3034   | 5.7584     |
| 360 → 345                        | -0.0376    | -22.852    |
| 340 → 325                        | -4.2526    | -3.7395    |
| 320 → 305                        | -6.1709    | 2.6227     |
| 300 → 285                        | 17.543     | -17.4505   |
| 280 → 265                        | -8.8076    | -12.6827   |
| 240 → 225                        | -12.7001   | 9.506      |
| 220 → 205                        | -8.9171    | -10.7618   |
| 0 → -15                          | -2.5523    | -7.8094    |
| -20 → -35                        | -2.0299    | 2.4773     |
| -40 → -55                        | 4.2796     | 2.4773     |
| -60 → -75                        | -0.3178    | -1.3408    |

<sup>a</sup> The  $I_{\Delta S}$  is the integrated intensity in the 185 → 170 ppm interval. No significant signal is expected in the other intervals and the uncertainty in  $I_{\Delta S}$  is the standard deviation of the integrated intensities in these intervals.

#### G. Criterion for quantitative labeling of the RP

This calculation shows the 20 mg aliquot of labeled amino acid in the 50 mL expression medium is sufficient for quantitative labeling of a RP. Consider that RP ≡ Hairpin, the labeled amino acid ≡ Leu, and the expression level = 500 mg Hairpin/L culture. There are 14 Leu's in the 92-residue Hairpin and mass Leu/mass Hairpin = 0.15. This is a "worst-case" example for labeling because of the high Leu mass fraction in Hairpin and because of the high expression level (which is two times greater than the already-high experimentally observed Hairpin expression level).

Minimum required mg Leu in 50 mL culture =

$$\begin{aligned}
 & [5 \times 10^2 \text{ mg Hairpin/L}] \times [5 \times 10^{-2} \text{ L}] \times [( \text{mole Hairpin} ) / (1.0723 \times 10^7 \text{ mg Hairpin})] \\
 & \times [(14 \text{ mole Leu}) / ( \text{mole Hairpin} )] \times [(1.33 \times 10^5 \text{ mg Leu}) / ( \text{mole Leu} )] \\
 & = 4 \text{ mg Leu}
 \end{aligned}$$

### H. Standard Curve Experiments

Three samples were prepared. For the first sample, 25 mg  $^{13}\text{CO},^{15}\text{N}$ -Leu was massed and then manually mixed with sufficient talc to fill the  $\sim 40\ \mu\text{L}$  volume of the rotor. The second sample was similarly prepared but with 5 mg  $^{13}\text{CO},^{15}\text{N}$ -Leu. For the third sample, 1 mg of  $^{13}\text{CO},^{15}\text{N}$ -Leu was manually mixed with sufficient talc to fill two rotor volumes and half of this mixture was used for the experiment. **Fig. S12** displays the  $^{13}\text{C}$  spectra of these three samples, **Table S14** displays the  $I_{\text{CO}}$  values determined from the spectral intensities, and **Fig. S13** displays a plot of the  $I_{\text{CO}}$  vs mole  $^{13}\text{CO}$  as well as best-fit line.

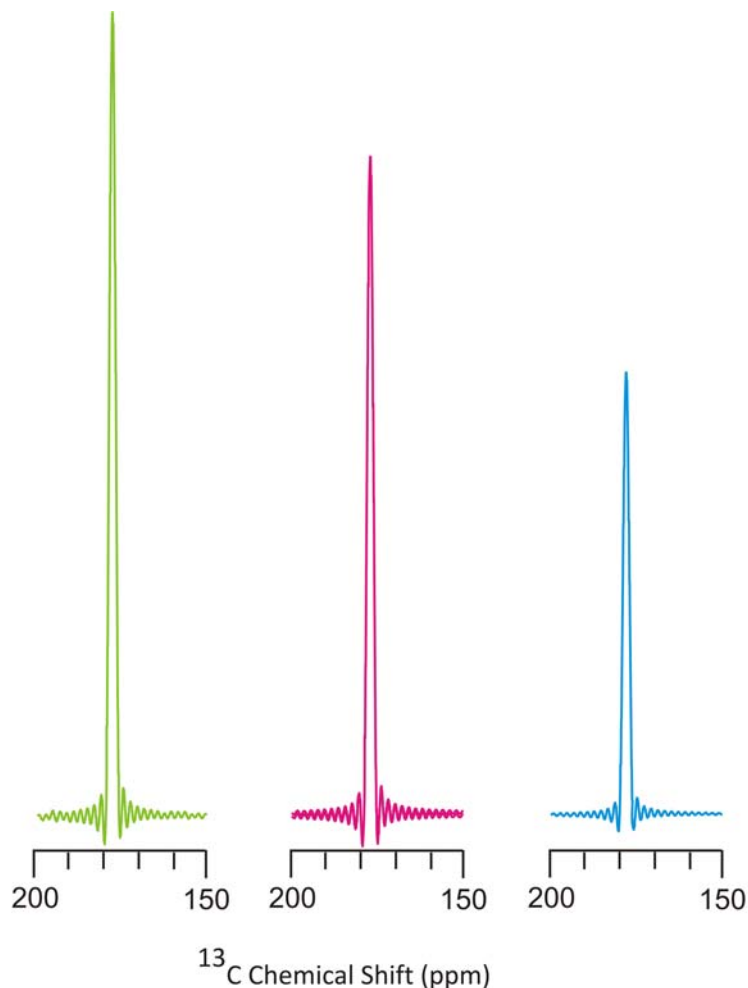

**Figure S12.**  $^{13}\text{C}$  spectra of samples containing  $^{13}\text{CO},^{15}\text{N}$ -Leu mixed with talc. The samples for the green, pink, and blue spectra respectively contained 0.5, 5, and 25 mg of  $^{13}\text{CO},^{15}\text{N}$ -Leu. The relative scaling factors of the green, pink and blue spectra are 50, 5, and 1 and were chosen to facilitate assessment of the degree of linearity of intensity vs mass  $^{13}\text{CO},^{15}\text{N}$ -Leu. Each REDOR  $S_0$  spectrum was acquired with 1 ms dephasing time and is the sum of 50,000 scans. Each spectrum was processed with 200 Hz Gaussian line broadening and 5<sup>th</sup> order polynomial baseline correction.

**Table S14.**  $I_{CO}$  values for the  $^{13}\text{CO}$ ,  $^{15}\text{N}$ -Leu/talc samples

| $^{13}\text{CO}$ , $^{15}\text{N}$ -Leu (mg) | $^{13}\text{CO}$ , $^{15}\text{N}$ -Leu (moles) | $I_{CO}^a$ |
|----------------------------------------------|-------------------------------------------------|------------|
| 0.5                                          | $3.75 \times 10^{-6}$                           | 1432 (12)  |
| 5                                            | $3.75 \times 10^{-5}$                           | 11666 (12) |
| 25                                           | $1.88 \times 10^{-4}$                           | 40603 (12) |

<sup>a</sup> The uncertainty was calculated based on the spectral noise of the sample containing 0.5 mg  $^{13}\text{CO}$ ,  $^{15}\text{N}$ -Leu. This spectrum was chosen because it had the smallest fluctuations arising from truncation of the free-induction data. The intrinsic (non-truncation) noise should be the same for all spectra because each was the sum of the same number of scans on the same spectrometer.

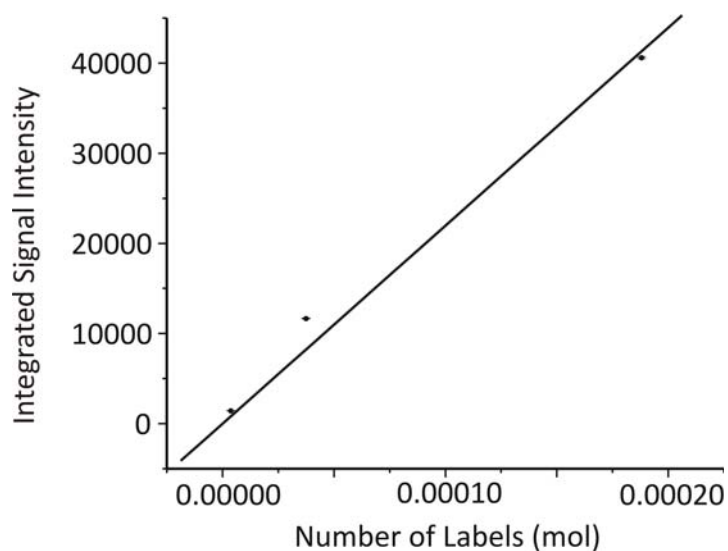

**Figure S13.**  $I_{CO}$  vs mole  $^{13}\text{CO}$  for three different samples prepared with  $^{13}\text{CO}$ ,  $^{15}\text{N}$ -Leu manually mixed with talc to fill the 4 mm rotor volume. The best  $y = mx$  linear fit to the data is  $I_{CO} = 2.12(13) \times 10^8$  mole  $^{13}\text{CO}$ . The best-fit  $R^2 = 0.9852$ .

I. HC determination of RP expression

**Fig. 1a** displays the HC variant  $^{13}\text{C}$  spectra of the  $\text{RP}^-_{lab}$  and most  $\text{RP}^+_{lab}$  ICP samples and **Fig. SI4** displays additional  $^{13}\text{C}$  spectra of the HPI samples.

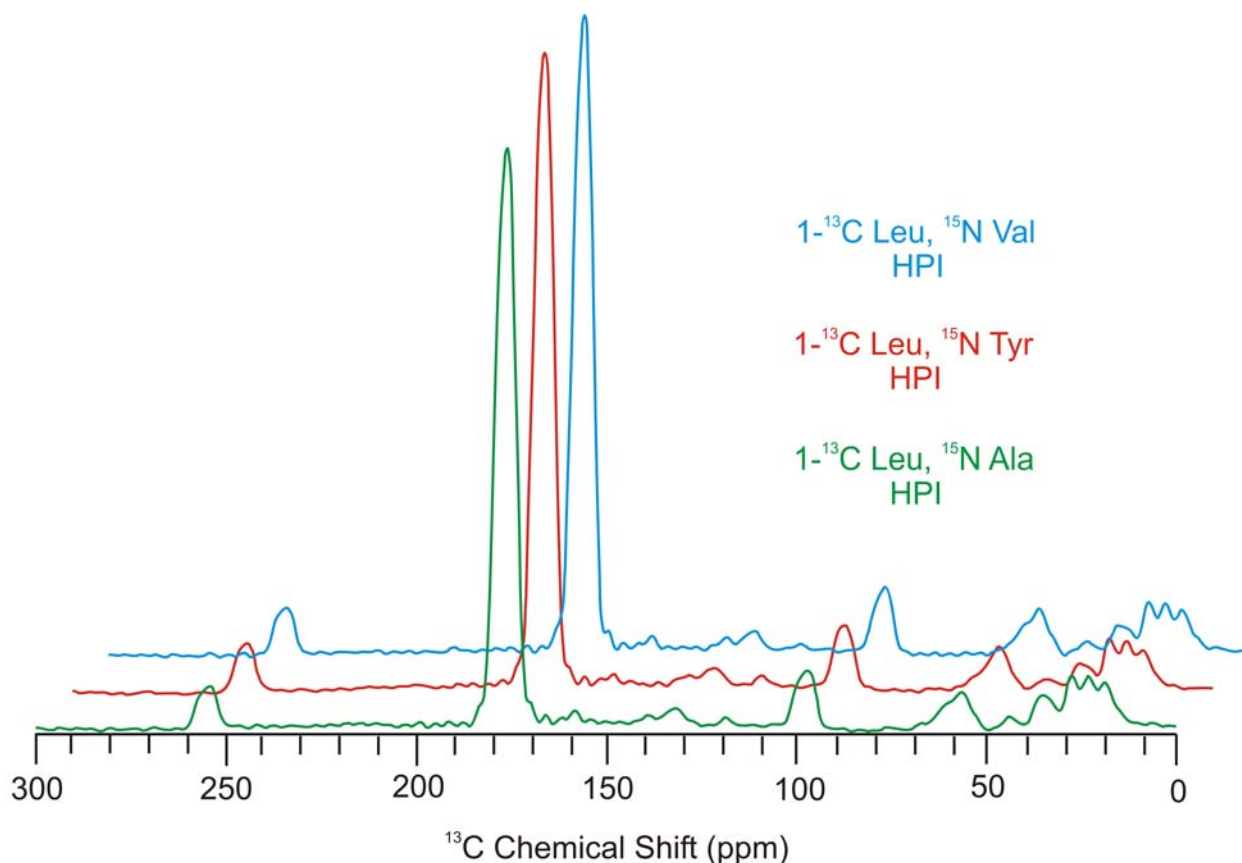

**Figure SI4.**  $^{13}\text{C}$  REDOR  $S_0$  spectra with 1 ms dephasing time for three different ICP  $\text{RP}^+_{lab}$  samples all with  $\text{RP} = \text{HPI}$  and  $^{13}\text{C}$ -Leu labeling. The  $^{15}\text{N}$  labeling differed among the samples but  $^{15}\text{N}$  nuclei do not affect the  $S_0$  spectrum. Each spectrum is the sum of 50,000 scans and was processed with 100 Hz Gaussian line broadening and a 5<sup>th</sup> order baseline correction. Minor scaling of the intensities was done to have more equal aliphatic (0-90 ppm) intensities among the three spectra.



The RP expression level is calculated with **Eq. S11** and the underlying rationales for this equation and descriptions of the terms are presented below.

Mass RP/volume culture =

$$\{(I_{CO^+}/I_{AI^+}) - (I_{CO^-}/I_{AI^-})\}/V_c \times I_{AI^0} \times C \times MW_{RP}/N_{lab} \quad (S11)$$

For spectra of both the  $RP_{lab}^+$  and  $RP_{lab}^-$  ICP samples, integrated intensities ( $I$ ) were measured for both the  $^{13}CO \equiv 170-185$  ppm region (ie.  $I_{CO^+}$  and  $I_{CO^-}$ ) and the aliphatic ( $AI$ )  $\equiv 0-90$  ppm region (ie.  $I_{AI^+}$  and  $I_{AI^-}$ ). The  $I_{CO}$  and  $I_{AI}$  for all samples are presented in **Table S15**. There are large variations among the  $I_{CO}$  values with the smallest value for the  $RP_{lab}^-$  sample, as expected.

The  $(I_{CO^+} - I_{CO^-})$  difference should be proportional to the number of moles of  $^{13}CO$ -Leu in the RP in the NMR sample. However, there is sample-to-sample variation in the total ICP mass packed into the NMR rotor and this should be accounted for because mass RP in the rotor is proportional to the mass ICP in the rotor. We considered that the ICP mass  $\propto I_{AI}$  as justified by: (1) the aliphatic  $^{13}C$  signal should not be affected by incorporation of  $^{13}CO$ -Leu into protein produced during the expression period; and (2) the **Table S15** data don't show any clear correlation between the  $I_{CO}$  and  $I_{AI}$  values of a sample; ie.  $I_{AI}$  is approximately independent of RP quantity. The effect of the  $RP_{lab}^+$  sample mass was accounted for with multiplication by  $I_{AI^0}/I_{AI^+}$  where  $I_{AI^0}$  corresponds to a "typical" sample. The effect of the  $RP_{lab}^-$  sample mass was accounted for by a similar factor  $I_{AI^0}/I_{AI^-}$ . For numerical calculation of RP expression levels,  $I_{AI^0} = 1000$  was chosen as the "typical" value, cf. **Table S15**.

$C$  is the standard curve-derived coefficient (mole  $^{13}CO$ )/ $I_{CO}$  ratio that is specific to the SSNMR spectrometer and probe. For the present study,  $C = 4.72 \times 10^{-9}$  mole  $^{13}CO$  and was determined using the standard curve and analysis presented in Section H.

$V_c$  corresponds to the culture volume needed to prepare an ICP that fills the NMR rotor.  $V_c = 25$  mL was used for the numerical calculations because about two rotors could be filled with the ICP from a 50 mL culture.

The (moles  $^{13}CO$ -Leu in the RP)/(volume culture) was converted to (mass RP)/(volume culture) with multiplication by  $MW_{RP}/N_{lab}$  where  $MW_{RP} \equiv$  RP molecular weight and  $N_{lab} \equiv$  number of labeled residues in the RP. The expression levels calculated with **Eq. S11** are presented in **Table S16**.

The calculations assume quantitative  $^{13}CO$ -Leu labeling of the RP. For  $f_{CO}$  fractional labeling, we expect that  $(I_{CO^+}/I_{AI^+}) - (I_{CO^-}/I_{AI^-})$  will be reduced by a factor of  $\sim f_{CO}$ . The **Table S16** calculated levels are therefore likely lower limits on RP expression.

**Table S15.**  $^{13}\text{C}$  signal intensities of the  $^{13}\text{CO}$ -Leu labeled ICP samples <sup>a,b</sup>

| Sample type                    | RP      | Labeled amino acid(s)                        | $I_{\text{CO}}$ | $I_{\text{Al}}$ | $I_{\text{Al}}^0/I_{\text{Al}}$ |
|--------------------------------|---------|----------------------------------------------|-----------------|-----------------|---------------------------------|
| RP <sup>-</sup> <sub>lab</sub> | none    | $^{13}\text{CO}, ^{15}\text{N}$ -Leu         | 353             | 802             | 1.25                            |
| RP <sup>+</sup> <sub>lab</sub> | Fgp41   | $^{13}\text{CO}, ^{15}\text{N}$ -Leu         | 1041            | 926             | 1.08                            |
| RP <sup>+</sup> <sub>lab</sub> | Fgp41+  | $^{13}\text{CO}, ^{15}\text{N}$ -Leu         | 918             | 857             | 1.17                            |
| RP <sup>+</sup> <sub>lab</sub> | FHA2    | $^{13}\text{CO}, ^{15}\text{N}$ -Leu         | 931             | 667             | 1.50                            |
| RP <sup>+</sup> <sub>lab</sub> | Hairpin | $^{13}\text{CO}, ^{15}\text{N}$ -Leu         | 1269            | 576             | 1.74                            |
| RP <sup>+</sup> <sub>lab</sub> | HPI     | $^{13}\text{CO}$ -Leu + $^{15}\text{N}$ -Val | 3708            | 1338            | 0.75                            |
| RP <sup>+</sup> <sub>lab</sub> | HPI     | $^{13}\text{CO}$ -Leu + $^{15}\text{N}$ -Ala | 2934            | 931             | 1.07                            |
| RP <sup>+</sup> <sub>lab</sub> | HPI     | $^{13}\text{CO}$ -Leu + $^{15}\text{N}$ -Tyr | 3796            | 1150            | 0.87                            |

<sup>a</sup> Integration windows are 170-185 ppm for  $I_{\text{CO}}$  and 0-90 ppm for  $I_{\text{Al}}$ .

<sup>b</sup>  $I_{\text{Al}}^0$  is for a typical sample and was set to 1000.

**Table S16.** RP expression calculated using the HC approach <sup>a</sup>

| RP      | Labeled amino acid(s)                        | $\frac{I_{\text{Al}}^0 \times [(I_{\text{CO}}^+/I_{\text{Al}}^+) - (I_{\text{CO}}^-/I_{\text{Al}}^-)]}{(I_{\text{CO}}^-/I_{\text{Al}}^-)}$ | $N_{\text{lab}}$ | $MW_{\text{RP}}(\text{Da})$ | Expression (mg RP/L culture) | Expression ( $\mu\text{mol}$ RP/L culture) |
|---------|----------------------------------------------|--------------------------------------------------------------------------------------------------------------------------------------------|------------------|-----------------------------|------------------------------|--------------------------------------------|
| Fgp41   | $^{13}\text{CO}, ^{15}\text{N}$ -Leu         | 684                                                                                                                                        | 24               | 18376                       | 105 (1)                      | 5.7 (1)                                    |
| Fgp41+  | $^{13}\text{CO}, ^{15}\text{N}$ -Leu         | 632                                                                                                                                        | 26               | 20809                       | 101 (2)                      | 4.9 (1)                                    |
| FHA2    | $^{13}\text{CO}, ^{15}\text{N}$ -Leu         | 956                                                                                                                                        | 13               | 22363                       | 329 (4)                      | 14.7 (2)                                   |
| Hairpin | $^{13}\text{CO}, ^{15}\text{N}$ -Leu         | 1763                                                                                                                                       | 14               | 10723                       | 270 (2)                      | 25.2 (2)                                   |
| HPI     | $^{13}\text{CO}$ -Leu + $^{15}\text{N}$ -Val | 2331                                                                                                                                       | 14               | 11348                       | 378 (3)                      | 33.3 (2)                                   |
| HPI     | $^{13}\text{CO}$ -Leu + $^{15}\text{N}$ -Ala | 2710                                                                                                                                       | 14               | 11348                       | 439 (3)                      | 38.7 (2)                                   |
| HPI     | $^{13}\text{CO}$ -Leu + $^{15}\text{N}$ -Tyr | 2862                                                                                                                                       | 14               | 11348                       | 464 (3)                      | 40.9 (2)                                   |

<sup>a</sup> The uncertainties in expression levels are calculated from spectral noise. The expression levels for the three samples with RP = HPI indicate that the typical sample-to-sample variation in expression is  $\pm 10\%$ .

### J. HCN determination of RP expression

**Fig. S15** displays the  $S_0$  and  $S_1$  spectra associated with **Fig. 2**, **Table S17** lists the parameters of the best-fit deconvolutions of the **Fig. 2**  $\Delta S$  spectra, **Fig. S16** displays the  $\Delta S$  spectra for the  $RP_{lab}^-$  and the  $RP_{lab}^+$  samples, and **Table S18** lists the peak shifts, line widths, and  $I_{\Delta S}$  for the  $RP_{lab}^+$  spectra. These figures and tables are followed by a description of the HCN approach to determination of RP expression.

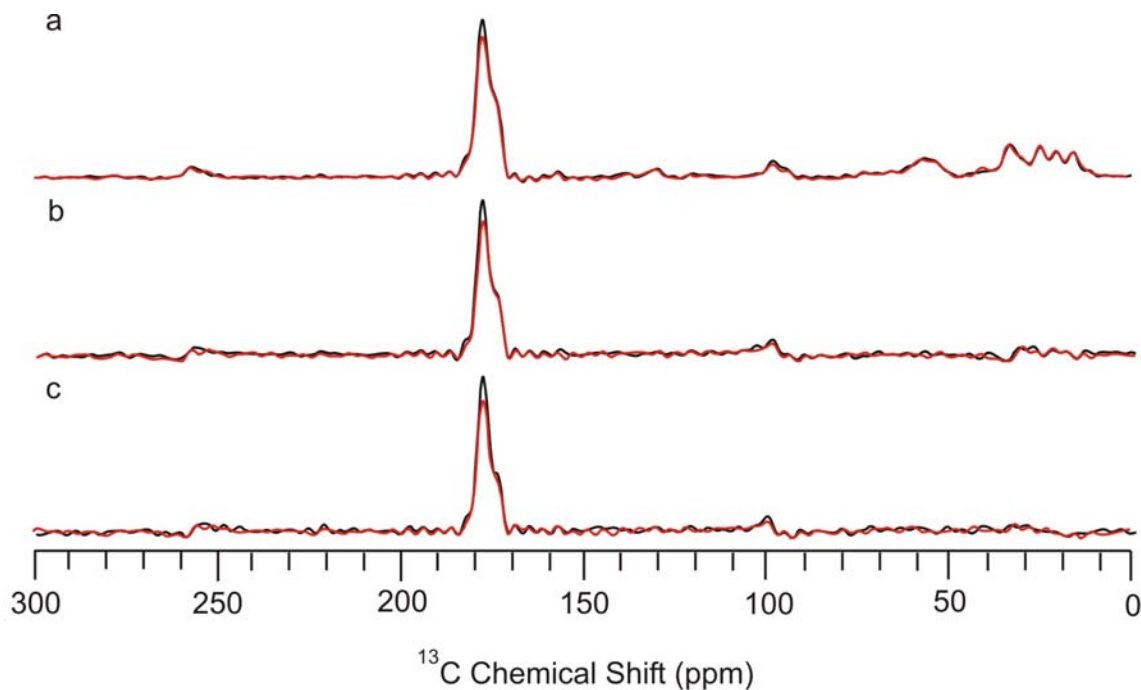

**Figure S15:**  $S_0$  (black) and  $S_1$  (red) spectra used for the  $\Delta S$  spectra displayed in **Fig. 2** in the main text. For panel a, the spectra are from a single  $RP_{lab}^+$  ICP sample for which the cells contained the Fgp41 plasmid and the expression medium contained  $^{13}\text{CO}$ ,  $^{15}\text{N}$ -Leu. For panel b, the displayed spectra are differences between the ( $RP_{lab}^+$ ) and ( $RP_{lab}^-$ ) samples, ie.  $S_0(RP_{lab}^+) - S_0(RP_{lab}^-)$  and  $S_1(RP_{lab}^+) - S_1(RP_{lab}^-)$ . For panel c, the displayed spectra are differences between the ( $RP_{lab}^+$ ) and ( $RP_{na}^+$ ) samples, ie.  $S_0(RP_{lab}^+) - S_0(RP_{na}^+)$  and  $S_1(RP_{lab}^+) - S_1(RP_{na}^+)$ . The same vertical scale was used for all spectra. Spectral processing included 5<sup>th</sup> order polynomial baseline correction and no line broadening. Each of the experimental spectra was the sum of 50,000 scans.

**Table S17.** Best-fit deconvolutions of Fig. 2  $\Delta S$  spectra <sup>a</sup>

| Fig. 2 spectrum | Peak <sup>13</sup> C shift (ppm) | Linewidth (ppm) | Integrated intensity |
|-----------------|----------------------------------|-----------------|----------------------|
| a               | 178.4                            | 3.0             | 61 (7)               |
| b               | 178.4                            | 3.1             | 57 (6)               |
| c               | 178.4                            | 2.8             | 53 (5)               |

<sup>a</sup> The parameters are for the best-fit Gaussian lineshape of the dominant <sup>13</sup>CO spectral peak including full-width at half-maximum linewidth. The uncertainty in integrated intensity is the RMSD spectral noise in a 5 ppm region.

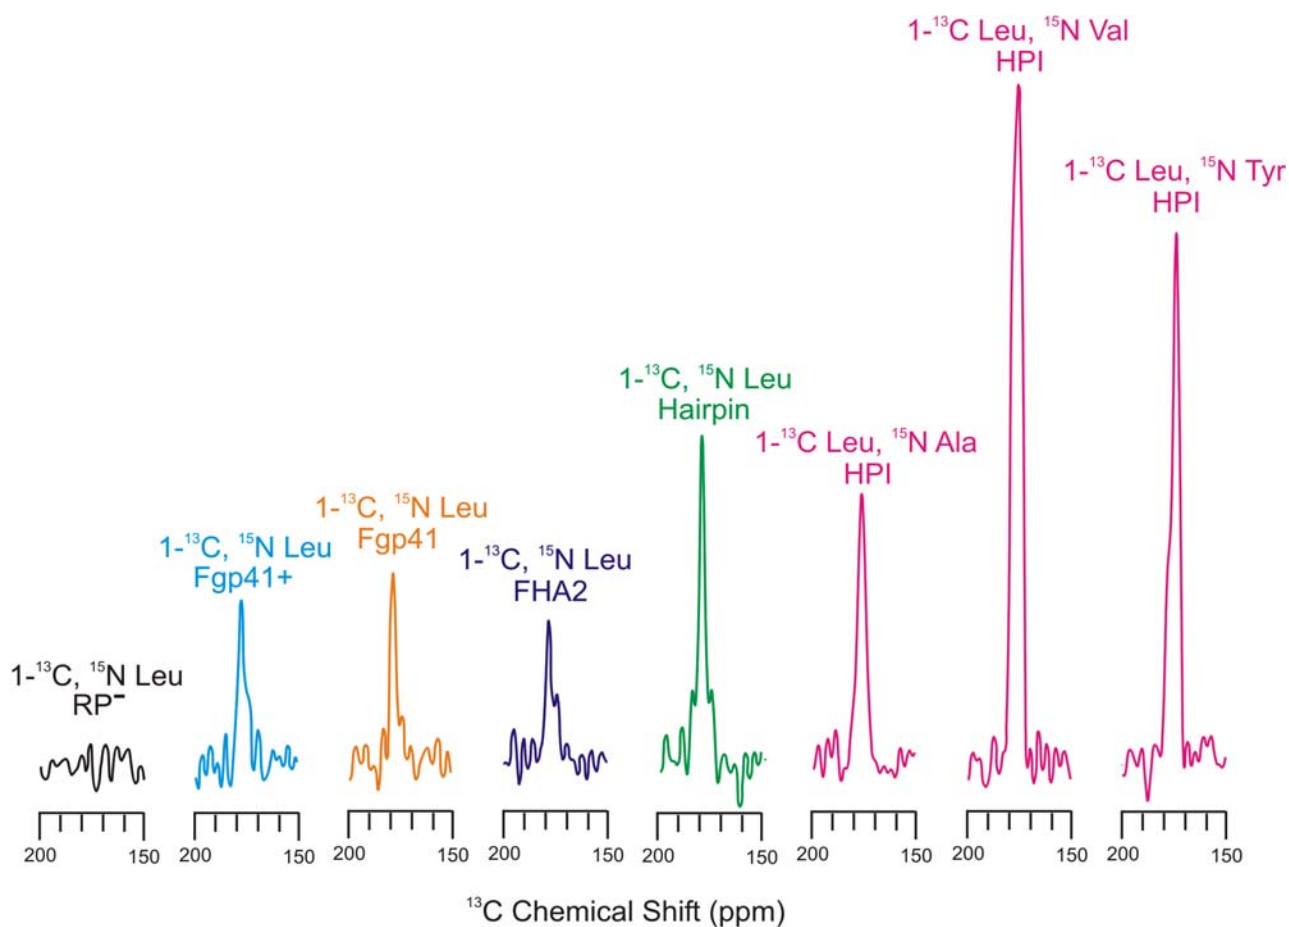

**Figure S16.**  $\Delta S$  spectra of the <sup>13</sup>CO region of the RP<sup>-</sup><sub>lab</sub> and RP<sup>+</sup><sub>lab</sub> ICP samples with the indicated <sup>13</sup>CO and <sup>15</sup>N labeling and RP. Each  $\Delta S$  spectrum was the difference between 50,000 S<sub>0</sub> and 50,000 S<sub>1</sub> scans and was processed without line broadening and with 5<sup>th</sup> order polynomial baseline correction. The spectra are displayed with the same vertical scale.

**Table S18.** Analysis of the  $\Delta S$  spectra of the  $RP^+_{lab}$  ICP samples

| RP                 | Labeled amino acid(s)                      | Peak shift (ppm) | Linewidth (ppm) <sup>a</sup> | $I_{\Delta S}$ <sup>b</sup> |
|--------------------|--------------------------------------------|------------------|------------------------------|-----------------------------|
| Fgp41 <sup>b</sup> | <sup>13</sup> CO, <sup>15</sup> N-Leu      | 178.3            | 3.5                          | 79                          |
| Fgp41+             | <sup>13</sup> CO, <sup>15</sup> N-Leu      | 178.1            | 4.5                          | 79                          |
| FHA2               | <sup>13</sup> CO, <sup>15</sup> N-Leu      | 178.6            | 3.4                          | 71                          |
| Hairpin            | <sup>13</sup> CO, <sup>15</sup> N-Leu      | 178.6            | 3.4                          | 139                         |
| HPI                | <sup>13</sup> CO-Leu + <sup>15</sup> N-Val | 175.2            | 7.0                          | 395                         |
| HPI                | <sup>13</sup> CO-Leu + <sup>15</sup> N-Ala | 176.6            | 5.3                          | 146                         |
| HPI                | <sup>13</sup> CO-Leu + <sup>15</sup> N-Tyr | 174.3            | 4.7                          | 251                         |

<sup>a</sup> Linewidth is full-width at half-maximum of the isotropic <sup>13</sup>CO peak.

<sup>b</sup> Each  $I_{\Delta S}$  was determined from integration over the isotropic <sup>13</sup>CO spectral region. The typical RMSD spectral noise was  $\sim 5$  as determined from integrations over other regions of the  $\Delta S$  spectrum.

**Table S18** presents the  $I_{\Delta S}$  integrated <sup>13</sup>CO intensities for all  $RP^+_{lab}$  ICP samples. The  $I_{\Delta S} \approx 0$  for the  $RP^-_{lab}$  sample, cf. **Fig. S16**. HCN RP expression was calculated using **Eq. S12** and the underlying rationales for this equation as well as descriptions of terms are presented below.

$$\text{Mass RP/volume culture} = I_{\Delta S}/V_c \times C/0.7 \times MW_{RP}/N_{dip} \quad (\text{S12})$$

The  $I_{\Delta S}/V_c \times C/0.7 = (\text{mole } ^{13}\text{CO-Leu in labeled } ^{13}\text{CO-}^{15}\text{N dipeptides in the RP in the rotor})/(\text{volume culture})$ . These ICP samples were prepared from  $V_c = 25$  mL culture volume. The  $C = 4.72 \times 10^{-9}$  mole <sup>13</sup>CO is the experimentally-determined conversion factor of spectral intensity to mole <sup>13</sup>CO, cf. section H. The 0.7 factor is the fractional dephasing of a directly bonded <sup>13</sup>CO-<sup>15</sup>N spin pair with 1 ms REDOR dephasing time.<sup>5,6</sup> The  $(\text{mole } ^{13}\text{CO-Leu in labeled } ^{13}\text{CO-}^{15}\text{N dipeptides in the RP})/(\text{volume culture})$  is converted to  $(\text{mass RP})/(\text{volume culture})$  by multiplication by  $MW_{RP}/N_{dip}$  where  $MW_{RP} \equiv$  RP molecular weight and  $N_{dip} \equiv$  number of labeled dipeptides in the RP. **Table S19** presents the  $I_{\Delta S}$ ,  $N_{dip}$ ,  $MW_{RP}$ , and calculated RP expression levels.

**Eq. S12** assumes quantitative <sup>13</sup>CO and <sup>15</sup>N labeling of the RP. For  $f_{CO}$  and  $f_N$  fractional labelings,  $I_{\Delta S}$  will be reduced by a factor of  $\sim (f_{CO} \times f_N)$  so the **Table S19** calculated levels are likely lower limits on RP expression.

**Table S19.** HCN determination of RP expression <sup>a</sup>

| RP      | Labeled amino acid(s)                      | $I_{\Delta S}$ | $N_{dip}$ | $MW_{RP}$ (Da) | Expression (mg RP/L culture) | Expression ( $\mu$ mol RP/L culture) |
|---------|--------------------------------------------|----------------|-----------|----------------|------------------------------|--------------------------------------|
| Fgp41   | <sup>13</sup> CO, <sup>15</sup> N-Leu      | 78.6           | 6         | 18376          | 65 (4)                       | 3.5 (2)                              |
| Fgp41+  | <sup>13</sup> CO, <sup>15</sup> N-Leu      | 78.9           | 6         | 20809          | 74 (4)                       | 3.5 (2)                              |
| FHA2    | <sup>13</sup> CO, <sup>15</sup> N-Leu      | 71.1           | 1         | 22363          | 429 (23)                     | 19.2 (1.0)                           |
| Hairpin | <sup>13</sup> CO, <sup>15</sup> N-Leu      | 138.6          | 4         | 10723          | 100 (4)                      | 9.3 (4)                              |
| HPI     | <sup>13</sup> CO-Leu + <sup>15</sup> N-Val | 394.6          | 2         | 11348          | 603 (7)                      | 53.2 (6)                             |
| HPI     | <sup>13</sup> CO-Leu + <sup>15</sup> N-Ala | 146.3          | 1         | 11348          | 447 (17)                     | 39.4 (1.5)                           |
| HPI     | <sup>13</sup> CO-Leu + <sup>15</sup> N-Tyr | 250.8          | 2         | 11348          | 384 (4)                      | 33.8 (4)                             |

<sup>a</sup> Uncertainties in expression levels are based on spectral noise.

Unlike the HC approach, determination of RP expression with the HCN approach did not take into account the ICP mass that was packed into the NMR rotor. This reflects the possibility that the HCN approach could be applied to a single  $RP_{lab}^+$  sample. For this case, it would be difficult to assess the “typical” value  $I_{Al}^0$  and the  $I_{Al}^0/I_{Al}^+$  scaling factor. For the present study, we have  $I_{Al}$  values from several  $RP_{lab}^+$  and  $RP_{lab}^-$  samples and have estimated  $I_{Al}^0 = 1000$ . Inclusion of the  $I_{Al}^0/I_{Al}$  scaling factor in the HCN analysis improves agreement between the expression levels calculated with the HC and HCN approaches. In particular, the HCN expression level for Hairpin increases from 100 to 175 mg/L and becomes much closer to the 270 mg/L level calculated with the HC approach.

## References

- (1) Bodner, M. L.; Gabrys, C. M.; Parkanzky, P. D.; Yang, J.; Duskin, C. A.; Weliky, D. P. *Magn. Reson. Chem.* **2004**, *42*, 187.
- (2) Zheng, Z.; Yang, R.; Bodner, M. L.; Weliky, D. P. *Biochemistry* **2006**, *45*, 12960.
- (3) Morcombe, C. R.; Zilm, K. W. *J. Magn. Reson.* **2003**, *162*, 479.
- (4) Tong, K. I.; Yamamoto, M.; Tanaka, T. *J. Biomol. NMR* **2008**, *42*, 59.
- (5) Gullion, T. *Concepts Magn. Reson.* **1998**, *10*, 277.
- (6) Yang, J. Ph. D. Thesis, Michigan State University, East Lansing, MI, 2003.
